# Supplementary material for: Transfer of human α-synuclein from the olfactory bulb to interconnected brain regions in mice
Source: PubMed Central journal article supplement (PMC3789892; doi:10.1007/s00401-013-1160-3), 2013-08-08
Supplement: 401_2013_1160_MOESM1_ESM.pdf [file 401_2013_1160_MOESM1_ESM.pdf]

**Supplementary table 3: Number of positive events per group. 1.5 h timepoint.**

| Groups            | OB ipsi | AON ipsi    | AON contra | FC ipsi | FC contra | TT ipsi | OTu ipsi | PC ipsi | Am ipsi | Str ipsi |
|-------------------|---------|-------------|------------|---------|-----------|---------|----------|---------|---------|----------|
| Monomers*         | 3/3     | 3/3         | 3/3        | 3/3     | 3/3       | 3/3     | 3/3      | 3/3     | 3/3     | 3/3      |
| Oligomers*        | 3/3     | 3/3         | 3/3        | 3/3     | 3/3       | 3/3     | 1/3      | 3/3     | 2/3     | 2/3      |
| Fibrils           | 4/4     | 0/4         | 0/4        | 0/4     | 0/4       | 0/4     | 0/4      | 0/4     | 0/4     | 0/4      |
| BSA               | 4/4     | 2/4 ant AON | 0/4        | 0/4     | 0/4       | 0/4     | 0/4      | 0/4     | 0/4     | 0/4      |
| ATTO-550          |         |             |            |         |           |         |          |         |         |          |
| Untagged monomers | 4/4     | 4/4         | 4/4        | 4/4     | 3/4       | 4/4     | 4/4      | 4/4     | 2/4     | 3/4      |

**Supplementary table 4: Number of positive events per group. 3 h timepoint.**

| Groups     | OB ipsi | AON ipsi    | AON contra | FC ipsi | FC contra | TT ipsi | OTu ipsi | PC ipsi | Am ipsi | Str ipsi |
|------------|---------|-------------|------------|---------|-----------|---------|----------|---------|---------|----------|
| Monomers*  | 3/3     | 3/3         | 1/3        | 3/3     | 0/3       | 2/3     | 3/3      | 3/3     | 0/3     | 0/3      |
| Oligomers* | 3/3     | 3/3         | 0/3        | 2/3     | 0/3       | 2/3     | 1/3      | 3/3     | 0/3     | 0/3      |
| Fibrils    | 4/4     | 0/4         | 0/4        | 0/4     | 0/4       | 0/4     | 0/4      | 0/4     | 0/4     | 0/4      |
| BSA        | 4/4     | 2/4 ant AON | 0/4        | 0/4     | 0/4       | 0/4     | 0/4      | 0/4     | 0/4     | 0/4      |
| ATTO-550   | 0/3     | 0/3         | 0/3        | 0/3     | 0/3       | 0/3     | 0/3      | 0/3     | 0/3     | 0/3      |

**Supplementary table 5: Number of positive events per group. Controls 3 h timepoint.**

| Monomers injected | Injection site         | OB ipsi | AON ipsi | FC ipsi | TT ipsi | OTu ipsi | PC ipsi | Am ipsi | Str ipsi |
|-------------------|------------------------|---------|----------|---------|---------|----------|---------|---------|----------|
| In LV             | Around inj site: 3/3   | 0/3     | 0/3      | 0/3     | 0/3     | 0/3      | 0/3     | 0/3     | 0/3      |
| In subarac. space | OB under inj site: 3/3 | 0/3     | 0/3      | 0/3     | 0/3     | 0/3      | 0/3     | 0/3     | 0/3      |

**Supplementary table 6: Number of positive events per group. 12 h timepoint.**

| Groups    | OB ipsi | AON ipsi | AON contra | FC ipsi | FC contra | TT ipsi | OTu ipsi | PC ipsi | Am ipsi | Str ipsi |
|-----------|---------|----------|------------|---------|-----------|---------|----------|---------|---------|----------|
| Monomers  | 4/4     | 1/4      | 0/4        | 3/4     | 0/4       | 0/4     | 0/4      | 0/4     | 0/4     | 0/4      |
| Oligomers | 4/4     | 4/4      | 0/4        | 4/4     | 0/4       | 0/4     | 0/4      | 0/4     | 0/4     | 0/4      |
| Fibrils   | 4/4     | 2/4      | 1/4        | 4/4     | 1/4       | 0/4     | 0/4      | 0/4     | 0/4     | 0/4      |
| BSA       | 4/4     | 0/4      | 0/4        | 0/4     | 0/4       | 0/4     | 0/4      | 0/4     | 0/4     | 0/4      |
| ATTO-550  |         |          |            |         |           |         |          |         |         |          |

**Supplementary table 7: Number of positive events per group. 72 h timepoint.**

| Groups    | OB ipsi | AON ipsi | AON contra | FC ipsi | FC contra | TT ipsi | OTu ipsi | PC ipsi | Am ipsi | Str ipsi |
|-----------|---------|----------|------------|---------|-----------|---------|----------|---------|---------|----------|
| Monomers  | 4/4     | 3/4      | 0/4        | 3/4     | 0/4       | 0/4     | 0/4      | 0/4     | 0/4     | 0/4      |
| Oligomers | 4/4     | 4/4      | 0/4        | 4/4     | 0/4       | 0/4     | 0/4      | 0/4     | 0/4     | 0/4      |
| Fibrils   | 4/4     | 3/4      | 1/4        | 4/4     | 0/4       | 0/4     | 0/4      | 0/4     | 0/4     | 0/4      |
| BSA       | 0/4     | 0/4      | 0/4        | 0/4     | 0/4       | 0/4     | 0/4      | 0/4     | 0/4     | 0/4      |
| ATTO-550  | 0/3     | 0/3      | 0/3        | 0/3     | 0/3       | 0/3     | 0/3      | 0/3     | 0/3     | 0/3      |

**Supplementary table 2-7: Number of positive events per group.**

Each fraction represents the proportion of mice exhibiting hu $\alpha$ -syn-positive cells in the named structure (ipsi: ipsilateral; Contra: contralateral) after injections of t $\alpha$ -syn or ATTO-500, or untagged  $\alpha$ -syn, or exhibiting a positive extracellular staining for BSA after tBSA injection, out of the total number of animals in each group. In the groups marked with an asterisk in the tables, one animal out of four was excluded due to technical issues.

Suppl table 5: Controls: 3 h after injection of monomers into the lateral ventricle or into the subarachnoid space.
