# Supplementary material for: Transfer of human α-synuclein from the olfactory bulb to interconnected brain regions in mice
Source: PubMed Central journal article supplement (PMC3789892; doi:10.1007/s00401-013-1160-3), 2013-08-08
Supplement: 401_2013_1160_MOESM3_ESM.pdf [file 401_2013_1160_MOESM3_ESM.pdf]

Supplementary figure 2

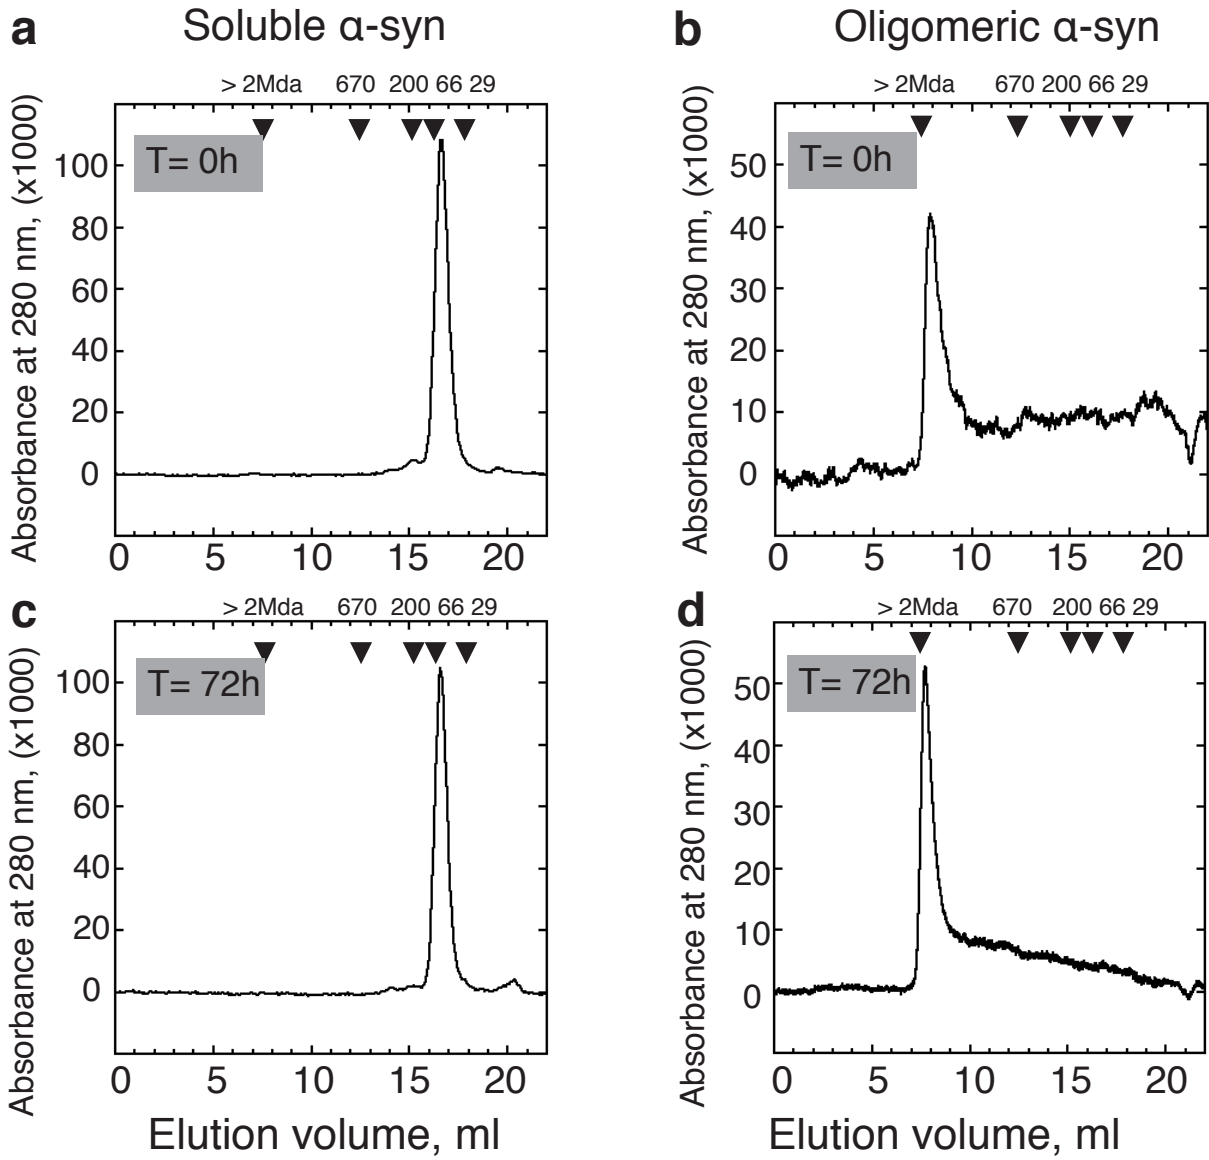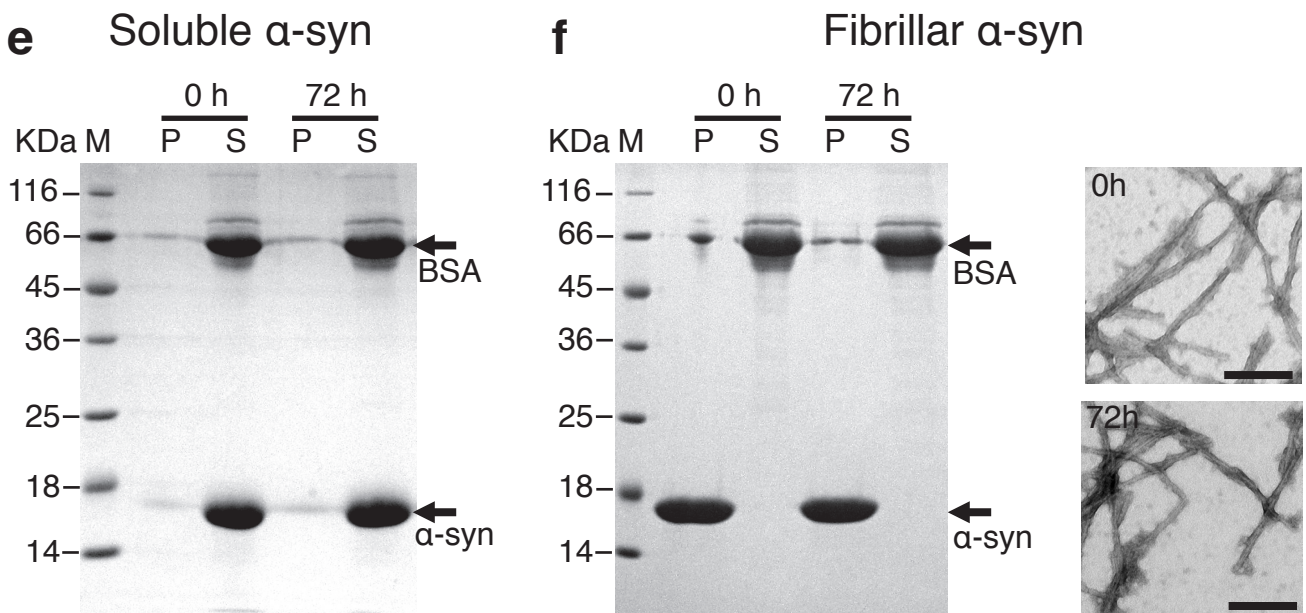

**Supplementary figure 2: Stability of recombinant monomeric, oligomeric and fibrillar assemblies over 72h.**

**a-d.** Stability of recombinant monomeric and oligomeric  $\alpha$ -syn over 72 h duration in assembly buffer.

**a.** and **b.** Size exclusion chromatography (SEC) of soluble and oligomeric  $\alpha$ -syn assemblies at time zero.

**c.** and **d.** SEC of soluble and oligomeric  $\alpha$ -syn assemblies after 72 h in assembly buffer at 37°C, without shaking. The corresponding monomer and oligomer peaks were unchanged, revealing that these assemblies are stable over the time of the experiment.

**e-f.** Stability of recombinant monomeric and fibrillar  $\alpha$ -syn assemblies (100  $\mu$ M) over a 72 h incubation in culture media containing fetal bovine serum. Standard SDS-polyacrylamide gel electrophoresis was performed in 10% gels following the method described by Laemmli (Laemmli, U. K. (1970) Nature 227, 680–685). Gels were stained with coomassie blue.

**e.** Sedimentation assay (30.000 g, 18°C, 30 min) of soluble  $\alpha$ -syn at initial (0 h) and after 72 h.

**f.** Sedimentation assay of  $\alpha$ -syn fibrils at initial (0 h) and after 72 h. Soluble and fibrillar  $\alpha$ -syn are not degraded over 72 h, nor polymerized for soluble  $\alpha$ -syn or depolymerized for  $\alpha$ -syn fibrils. Molecular weight marker (M), pellet (P), supernatant (S).
