# Supplementary material for: Transfer of human α-synuclein from the olfactory bulb to interconnected brain regions in mice
Source: Springer Nature journal article supplement (doi:10.1007/s00401-013-1160-3), 2013-08-07
Supplement: MOESM8 [file 8404280]

Supplementary figure 7

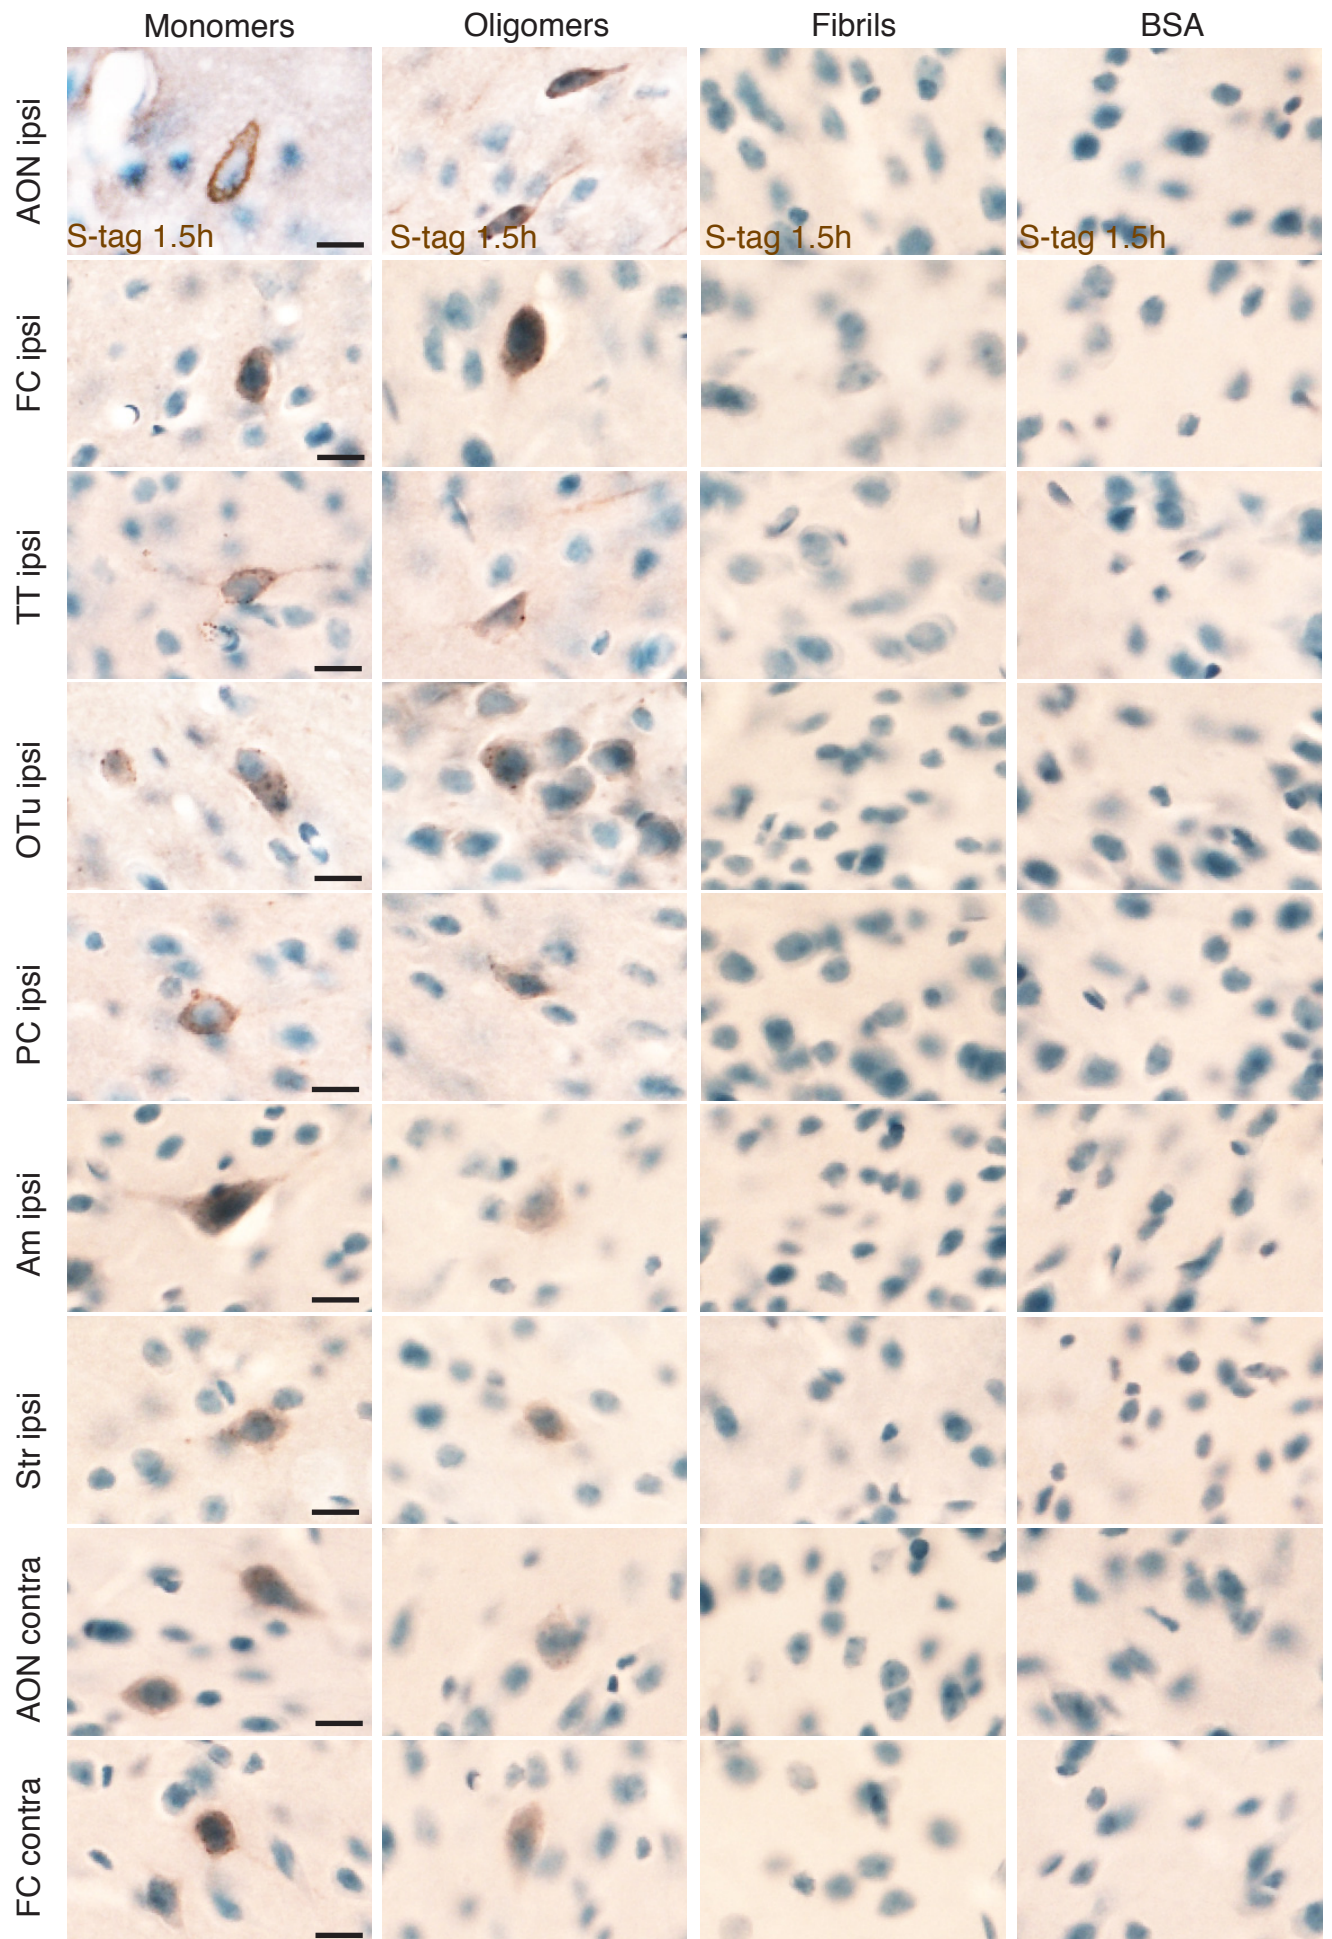

**Supplementary figure 7: S-tag staining 1.5 h after injection of tagged  $\alpha$ -synuclein or tBSA into the olfactory bulb.**

Images of S-tag staining at high magnification (scale bar represents 10  $\mu$ m) in various brain areas 1.5 h after injection of monomeric and oligomeric  $\alpha$ -syn into the OB. S-tag-positive cells were present in the ipsilateral and contralateral anterior olfactory nucleus (ipsi/ contra AON), in ipsi- and contralateral frontal cortex (ipsi/contra FC), in ipsilateral tenia tecta (ipsi TT), in ipsilateral olfactory tubercle (ipsi Otu), ipsilateral piriform cortex (ipsi PC), amygdala (ipsi Am) and striatum (ipsi Str). Moreover, S-tag-positive cells were observed only in the ipsilateral OB when we injected fibrillar  $\alpha$ -syn. tBSA injected as a control protein into the OB was not tagged with S-tag, and was not detected by anti-S-tag staining. Scale bar represents 10  $\mu$ m.
