# Supplementary material for: Transfer of human α-synuclein from the olfactory bulb to interconnected brain regions in mice
Source: Springer Nature journal article supplement (doi:10.1007/s00401-013-1160-3), 2013-08-07
Supplement: MOESM9 [file 8404280]

## Suppl figure 8

### Untagged Monomers

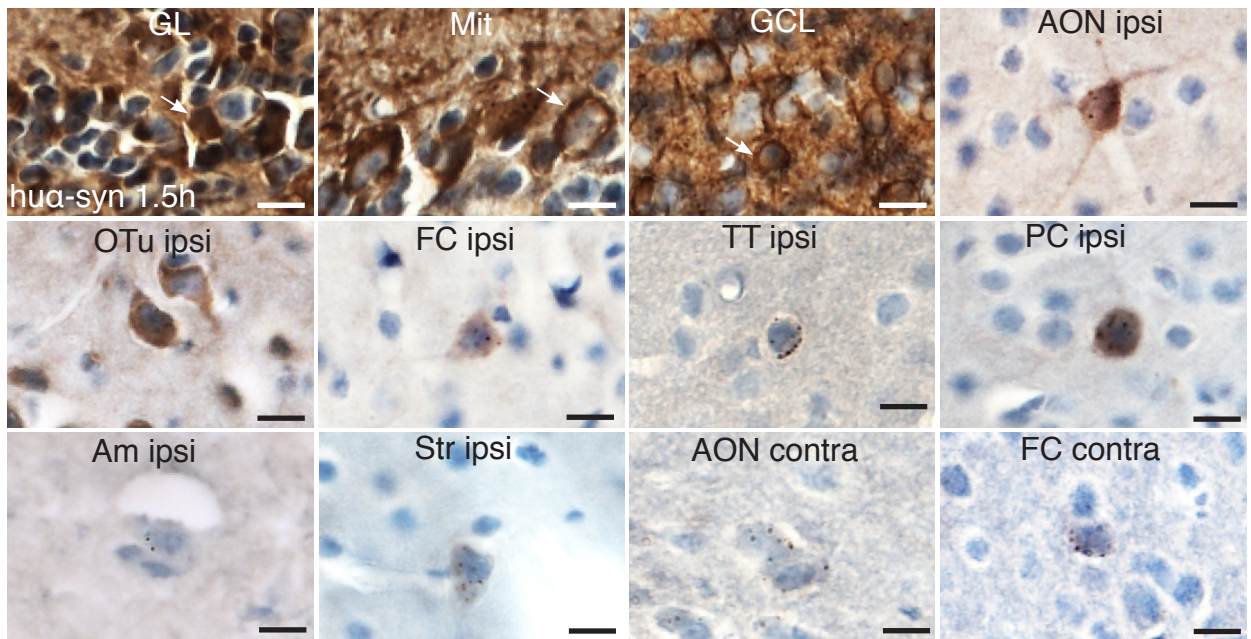

### **Supplementary figure 8: Human- $\alpha$ -synuclein staining 1.5 h after injection of untagged $\alpha$ -syn monomers into the OB.**

Pictures of hu- $\alpha$ -syn staining at high magnification (scale bar represents 10  $\mu$ m) in various brain areas 1.5 h after injection. Hu- $\alpha$ -syn-positive cells were detected in the same structures 1.5 h after the injection of monomeric untagged  $\alpha$ -syn into the OB, as observed after injections of tagged  $\alpha$ -syn. Hu-positive cells were present in the ipsi- and contralateral anterior olfactory nucleus (ipsi/ contra AON), in ipsi- and contralateral frontal cortex (ipsi/contra FC), in ipsilateral tenia tecta (ipsi TT), in ipsilateral olfactory tubercle (ipsi Otu), ipsilateral piriform cortex (ipsi PC), amygdala (ipsi Am) and striatum (ipsi Str). Scale bar represents 10  $\mu$ m.
